# Supplementary material
Source: HighWire-hosted journal article supplement (https://tsaco.smart01.highwire.org/content/4/1/e000342)

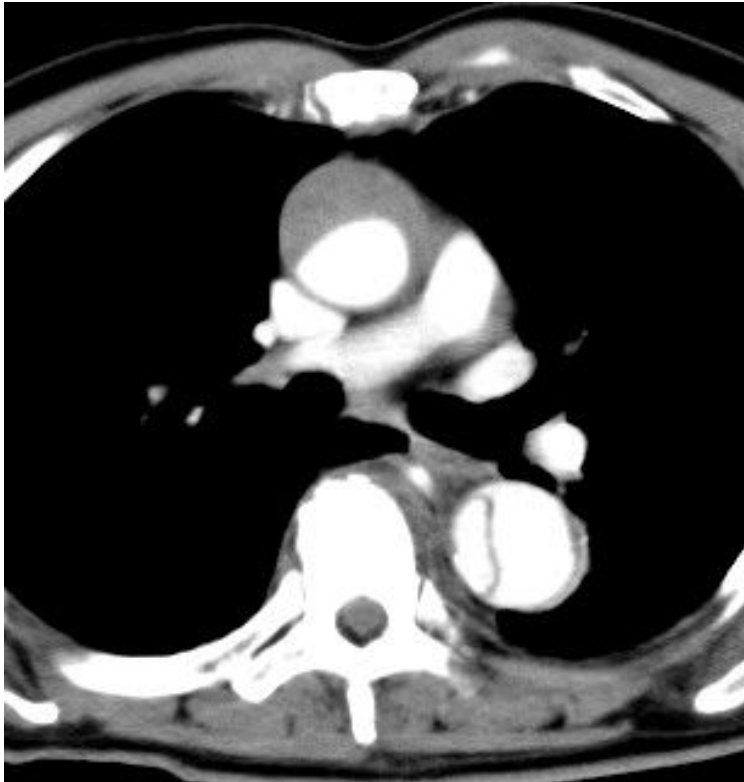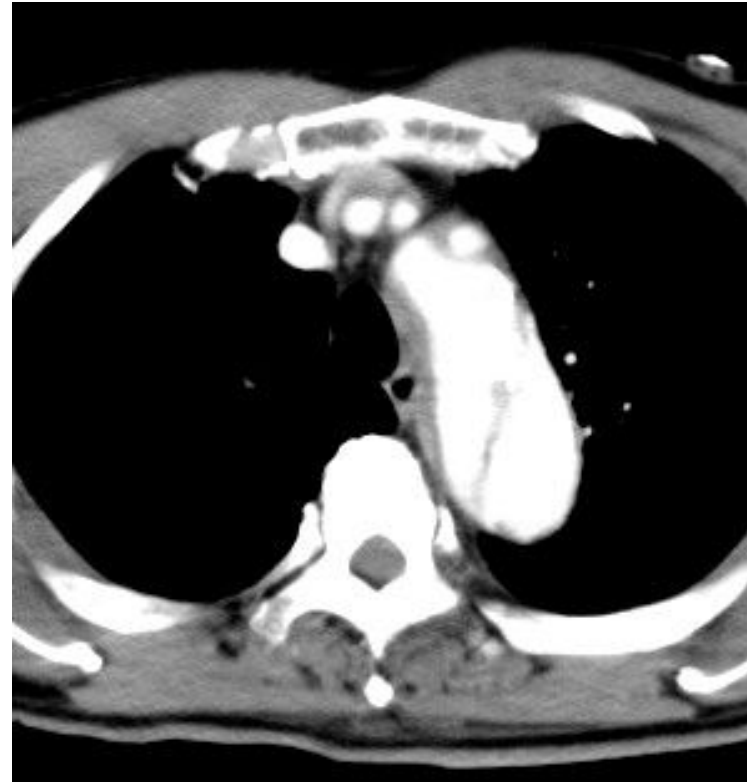

Supplement: inline-supplementary-material-1 [file inline-supplementary-material-1.pdf]
